# Supplementary material for: Impact of the Preparation Procedure on the Performance of the Microporous HKUST-1 Metal-Organic Framework in the Liquid-Phase Separation of Aromatic Compounds
Source: PubMed Central journal article supplement (PMC7321157; doi:10.3390/molecules25112648), 2020-06-06
Supplement: molecules-25-02648-s001.pdf [file molecules-25-02648-s001.pdf]

# Impact of the Preparation Procedure on the Performance of the Microporous HKUST-1 Metal-Organic Framework in the Liquid-Phase Separation of Aromatic Compounds

Vera I. Isaeva <sup>1,2,\*</sup>, Bulat R. Saifutdinov <sup>3,\*</sup>, Vladimir V. Chernyshev <sup>3,4</sup>, Vadim V. Vergun <sup>1</sup>, Gennady I. Kapustin <sup>1,2</sup>, Yulia P. Kurnysheva <sup>3</sup>, Mikhail M. Ilyin <sup>5</sup> and Leonid M. Kustov <sup>1,2</sup>

<sup>1</sup> N.D. Zelinsky Institute of Organic Chemistry, Russian Academy of Sciences, Leninsky prospect 47, Moscow 119991, Russia; [polubrat@mail.ru](mailto:polubrat@mail.ru) (V.V.V.); [gik@ioc.ac.ru](mailto:gik@ioc.ac.ru) (G.I.K.); [lmkustov@mail.ru](mailto:lmkustov@mail.ru) (L.M.K.)

<sup>2</sup> National University of Science and Technology MISiS, Leninsky prospect 4, Moscow 119991, Russia

<sup>3</sup> A.N. Frumkin Institute of Physical Chemistry and Electrochemistry, Russian Academy of Sciences, Building 4, 31 Leninsky prospect, Moscow 119071, Russia; [vladimir@struct.chem.msu.ru](mailto:vladimir@struct.chem.msu.ru) (V.V.C.); [kurnyshevay@mail.ru](mailto:kurnyshevay@mail.ru) (Y.P.K.)

<sup>4</sup> Department of Chemistry, M.V. Lomonosov Moscow State University, 1-3 Leninskie Gory, Moscow 119991, Russia

<sup>5</sup> A.N. Nesmeyanov Institute of Organoelement Compounds, Russian Academy of Sciences, 28 Vavilov St., Moscow 119991, Russia; [mil@ineos.ac.ru](mailto:mil@ineos.ac.ru) (M.M.I.)

\* Correspondence: [sharf@ioc.ac.ru](mailto:sharf@ioc.ac.ru) (V.I.I.); [bulatrsaifutdinov@gmail.com](mailto:bulatrsaifutdinov@gmail.com) (B.R.S.)

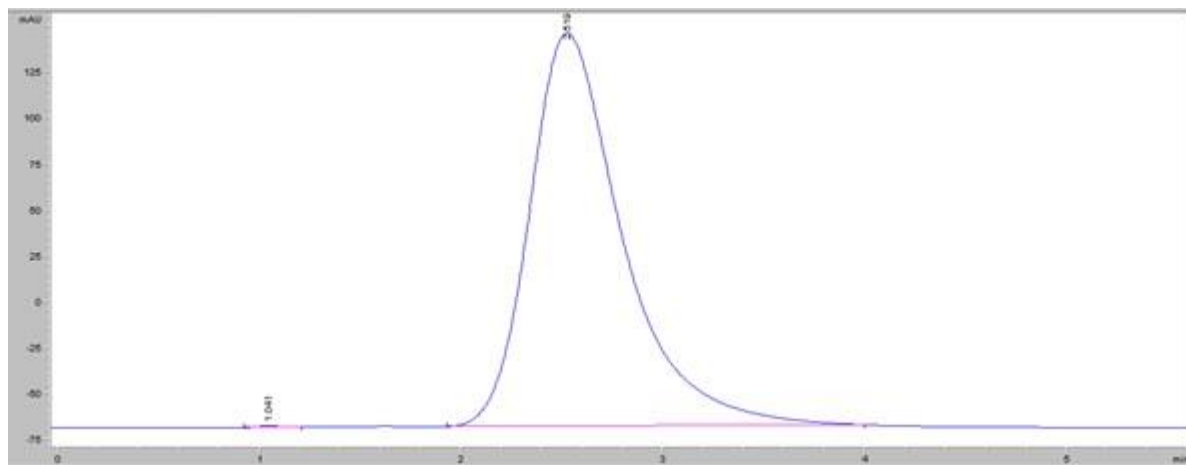

Figure S1. Output curve recorded during the elution of 2,3-dichlorophenol at 65°C through the porous HKUST-1 layer.

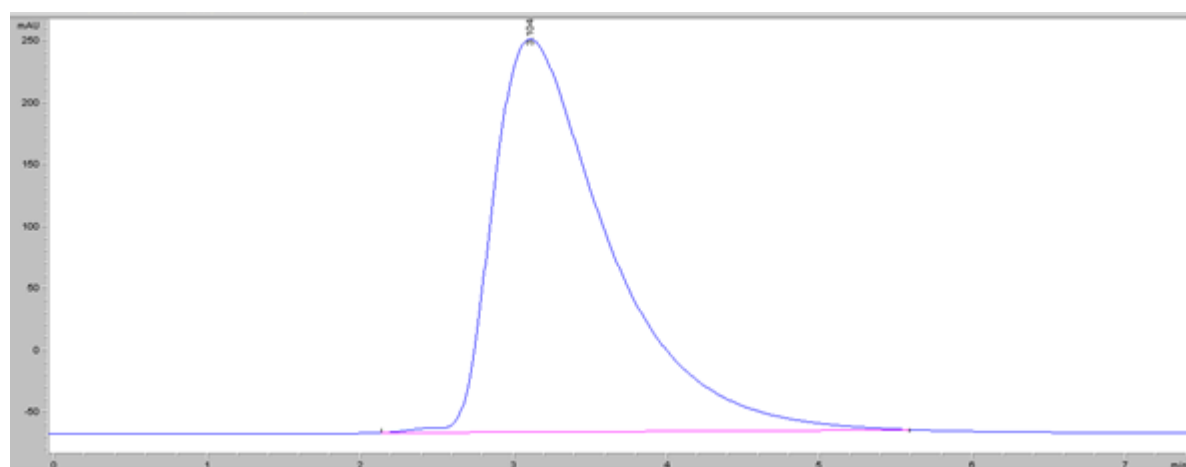

Figure S2. Output curve recorded during the elution of 2,4-dichlorophenol at 65°C through the porous HKUST-1 layer.

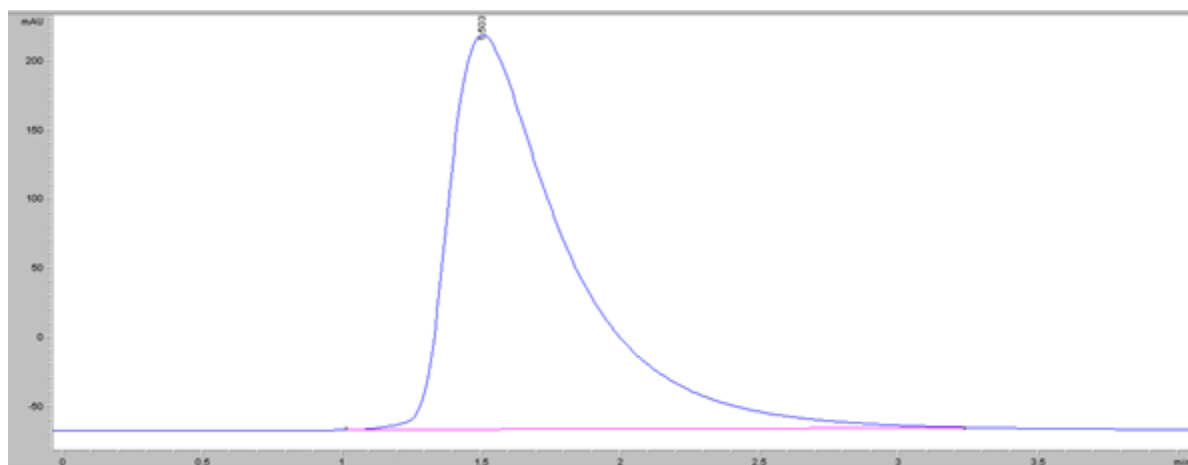

**Figure S3.** Output curve recorded during the elution of 2,5-dichlorophenol at 65°C through the porous HKUST-1 layer.

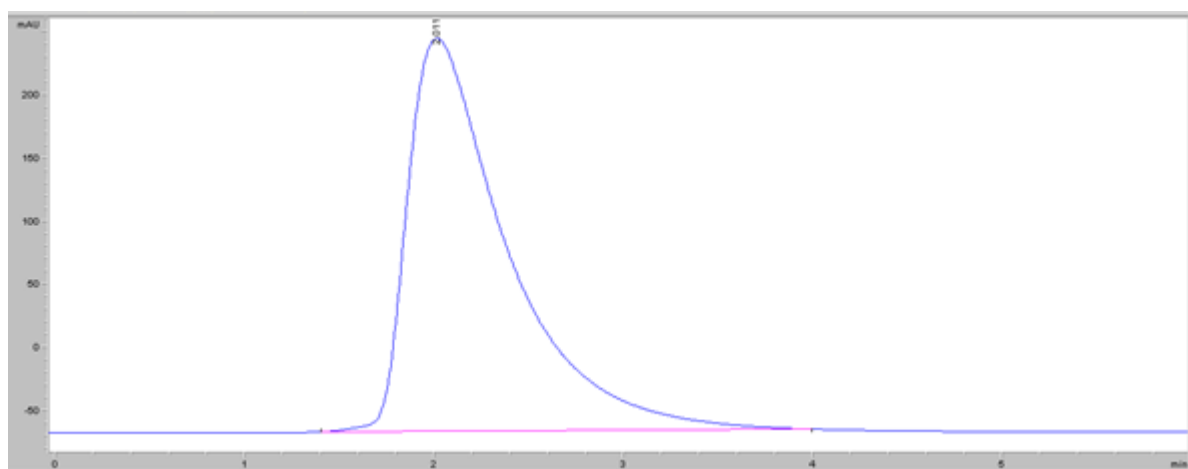

**Figure S4.** Output curve recorded during the elution of 2,6-dichlorophenol at 65°C through the porous HKUST-1 layer.
